# Supplementary material for: Resolving the degradation pathways of the O3-type layered oxide cathode surface through the nano-scale aluminum oxide coating for high-energy density sodium-ion batteries
Source: Royal Society of Chemistry journal article supplement (doi:10.1039/c7ta08443a), 2017-01-01
Supplement: c7ta08443a1.pdf [file c7ta08443a1.pdf]

## Supplementary Information

Resolving the degradation pathways on O3-type layered oxides cathode surface through the nano-scale aluminum oxide coating for high-energy density sodium-ion batteries

Jang-Yeon Hwang,<sup>a</sup> Seung-Taek Myung,<sup>b</sup> Ji Ung Choi,<sup>b</sup> Chong Seung Yoon,<sup>c</sup> Hitoshi Yashiro,<sup>d</sup> Yang-Kook Sun<sup>a,\*</sup>

<sup>a</sup>Department of Energy Engineering, Hanyang University, Seoul, 04763, Republic of Korea

<sup>b</sup>Department of Nanotechnology and Advanced Materials Engineering & Sejong Battery Institute, Sejong University, Seoul, 05006, South Korea

<sup>c</sup>Department of Materials Science and Engineering, Hanyang University, Seoul, 04763, Republic of Korea

<sup>d</sup>Department of Chemistry and Bioengineering, Iwate University, 4-3-5 Ueda, Morioka, Iwate 020-8551, Japan

\* To whom correspondence should be addressed.

Phone: (82) 2220-1749. Fax: (82) 2298-5416. E-mail: yksun@hangyang.ac.kr

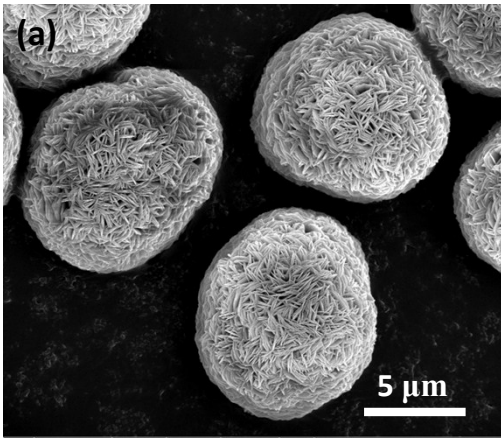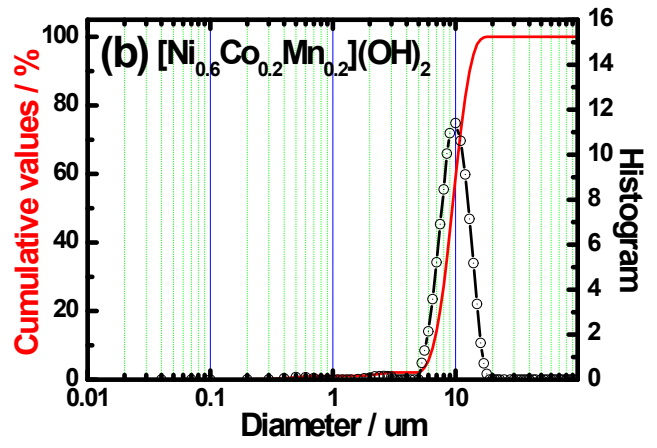

**Fig. S1** (a) Scanning electron microscopy (SEM) image and (b) particle size analysis (PSA) of the  $[\text{Ni}_{0.6}\text{Co}_{0.2}\text{Mn}_{0.2}](\text{OH})_2$  precursor.

**Table S1.** ICP-AES results for the  $[\text{Ni}_{0.6}\text{Co}_{0.2}\text{Mn}_{0.2}](\text{OH})_2$  precursor.

---

| Metal stoichiometry determined by ICP-AES                      |      |      |      |
|----------------------------------------------------------------|------|------|------|
| Sample                                                         | Ni   | Co   | Mn   |
| $[\text{Ni}_{0.6}\text{Co}_{0.2}\text{Mn}_{0.2}](\text{OH})_2$ | 0.61 | 0.21 | 0.19 |

---

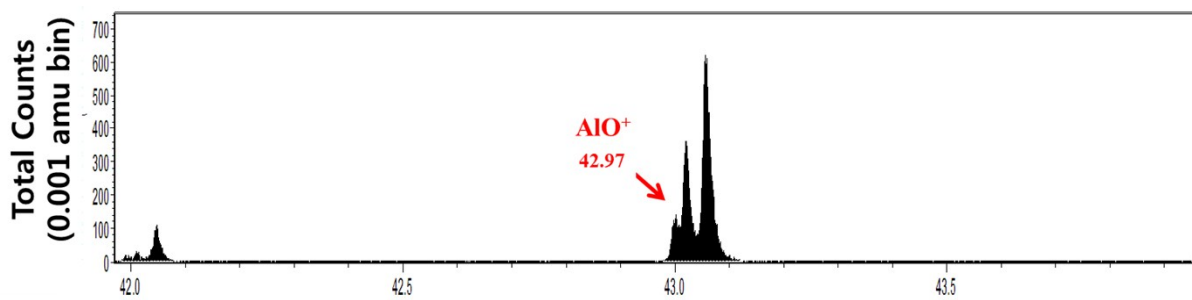

**Fig. S2** ToF-SIMS spectra of the outmost surface of the  $\text{Al}_2\text{O}_3$  coated  $\text{Na}[\text{Ni}_{0.6}\text{Co}_{0.2}\text{Mn}_{0.2}]\text{O}_2$  cathode.

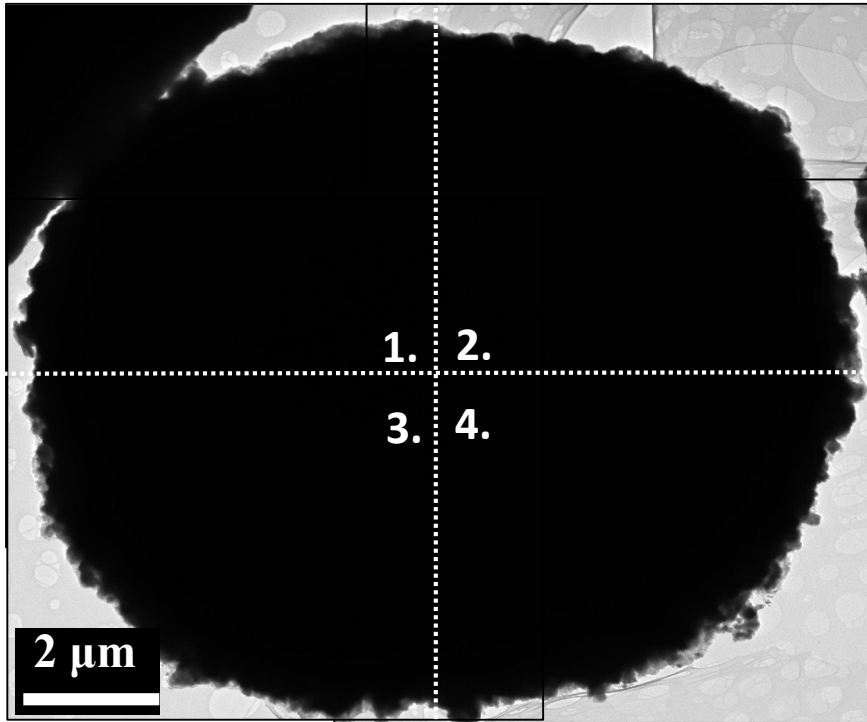

**Fig. S3** Mosaic TEM image of  $\text{Al}_2\text{O}_3$  coated  $\text{Na}[\text{Ni}_{0.6}\text{Co}_{0.2}\text{Mn}_{0.2}]\text{O}_2$  particle.

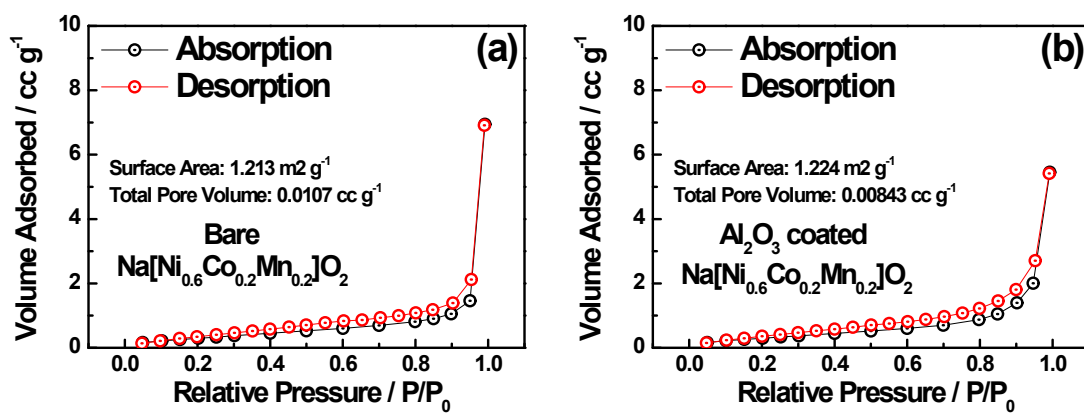

**Fig. S4** Isotherm profiles with surface area and total pore volume of bare  $\text{Na}[\text{Ni}_{0.6}\text{Co}_{0.2}\text{Mn}_{0.2}]\text{O}_2$  and  $\text{Al}_2\text{O}_3$  coated  $\text{Na}[\text{Ni}_{0.6}\text{Co}_{0.2}\text{Mn}_{0.2}]\text{O}_2$  cathodes.

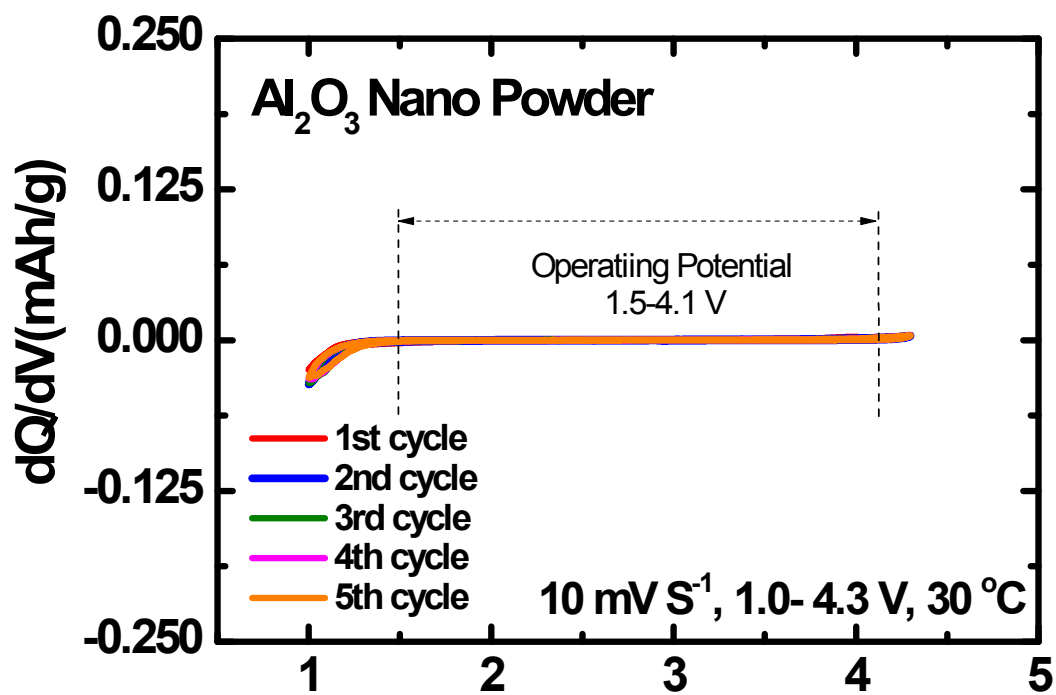

Fig. S5 Cyclic voltammetry (CV) curves of Al<sub>2</sub>O<sub>3</sub> nano powder.

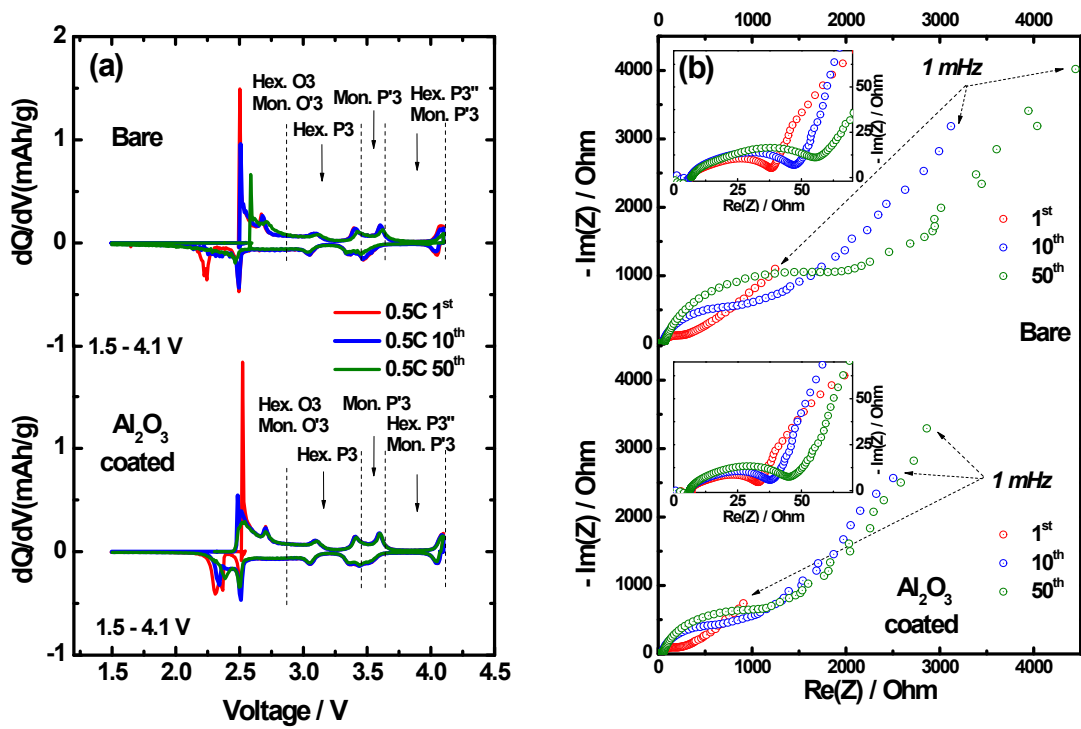

**Fig. S6** (a)  $dQ dV^{-1}$  ( $\text{mAh g}^{-1}$ ) curves and (b) electrochemical impedance spectroscopy (EIS) results for bare  $\text{Na}[\text{Ni}_{0.6}\text{Co}_{0.2}\text{Mn}_{0.2}]\text{O}_2$  and  $\text{Al}_2\text{O}_3$  coated  $\text{Na}[\text{Ni}_{0.6}\text{Co}_{0.2}\text{Mn}_{0.2}]\text{O}_2$  cathodes during cycling at a 0.5 C rate ( $75 \text{ mA g}^{-1}$ ) in a half cell.



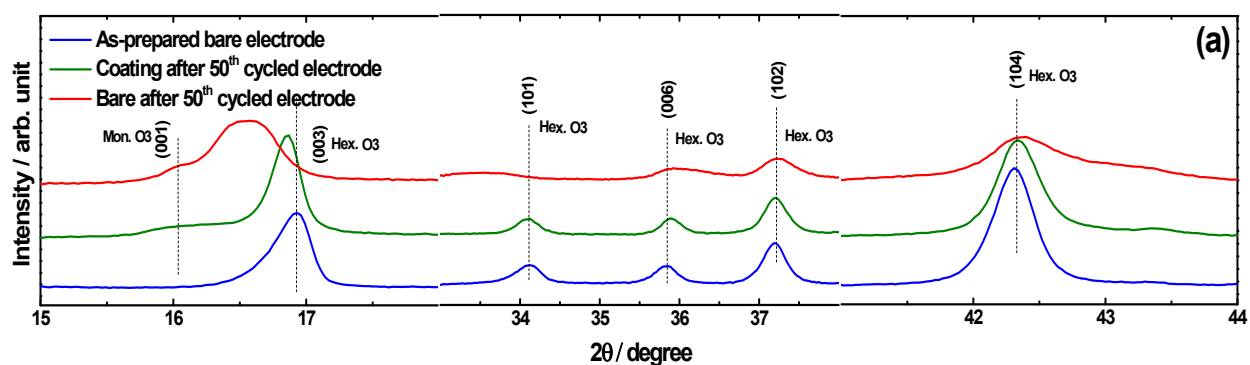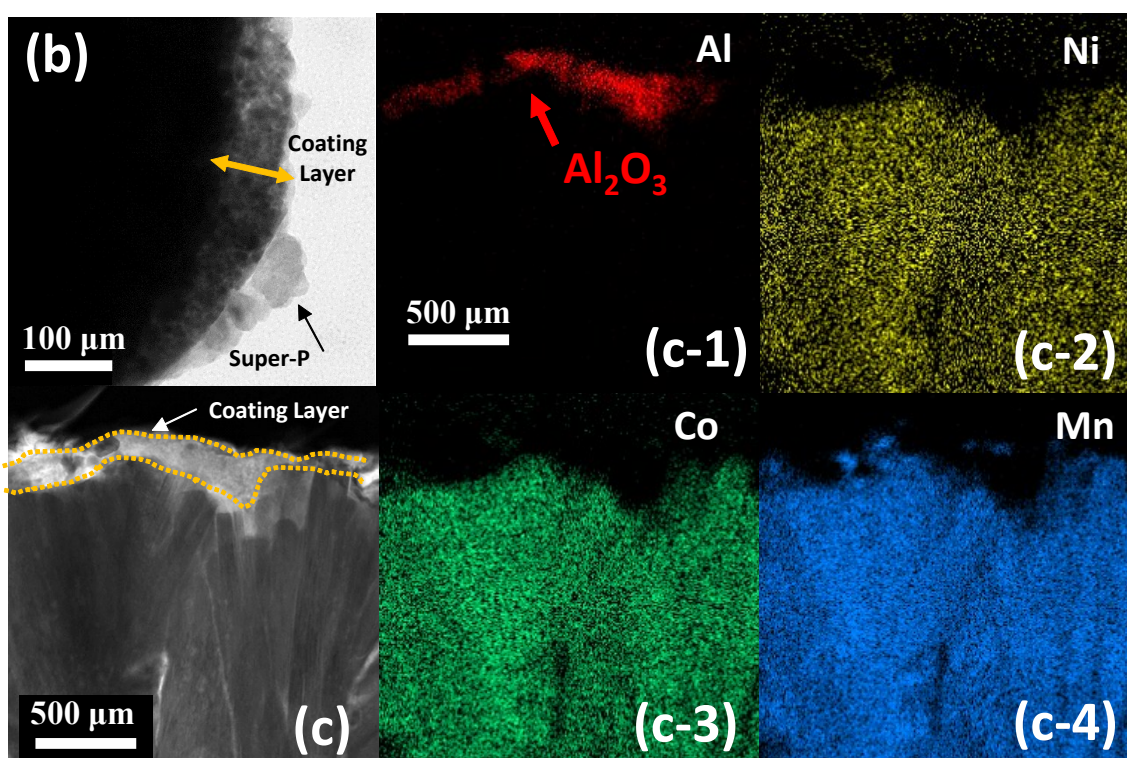

**Fig. S7** Post-cycling study: (a) ex-situ XRD results before and after cycling for bare  $\text{Na}[\text{Ni}_{0.6}\text{Co}_{0.2}\text{Mn}_{0.2}]\text{O}_2$  and  $\text{Al}_2\text{O}_3$  coated  $\text{Na}[\text{Ni}_{0.6}\text{Co}_{0.2}\text{Mn}_{0.2}]\text{O}_2$  electrodes. (b) Bright field TEM image and (c) cross sectional TEM image with (c-1 to c-4) corresponding EDX mapping results for cycled  $\text{Al}_2\text{O}_3$  coated  $\text{Na}[\text{Ni}_{0.6}\text{Co}_{0.2}\text{Mn}_{0.2}]\text{O}_2$  cathode in a half cell.



**Table S2.** Electrochemical impedance spectroscopy (EIS) results for pouch-type bare Na[Ni<sub>0.6</sub>Co<sub>0.2</sub>Mn<sub>0.2</sub>]O<sub>2</sub>/hard carbon full cell and Al<sub>2</sub>O<sub>3</sub> coated Na[Ni<sub>0.6</sub>Co<sub>0.2</sub>Mn<sub>0.2</sub>]O<sub>2</sub>/hard carbon full cell at the 1<sup>st</sup> and 300<sup>th</sup> cycles at a 0.5 C rate (75 mA g<sup>-1</sup>).

| <b>Cathode materials</b>                                                 | <b>Cycles</b>           | <b>R<sub>sf</sub> (Ω)</b> | <b>R<sub>ct</sub> (Ω)</b> |
|--------------------------------------------------------------------------|-------------------------|---------------------------|---------------------------|
| <b>Bare</b>                                                              | <b>1<sup>st</sup></b>   | 3.7                       | 12.8                      |
| <b>Na[Ni<sub>0.6</sub>Co<sub>0.2</sub>Mn<sub>0.2</sub>]O<sub>2</sub></b> | <b>300<sup>th</sup></b> | 11.7                      | 220.2                     |
| <b>Al<sub>2</sub>O<sub>3</sub> coated</b>                                | <b>1<sup>st</sup></b>   | 3.2                       | 10.7                      |
| <b>Na[Ni<sub>0.6</sub>Co<sub>0.2</sub>Mn<sub>0.2</sub>]O<sub>2</sub></b> | <b>300<sup>th</sup></b> | 3.1                       | 77.5                      |

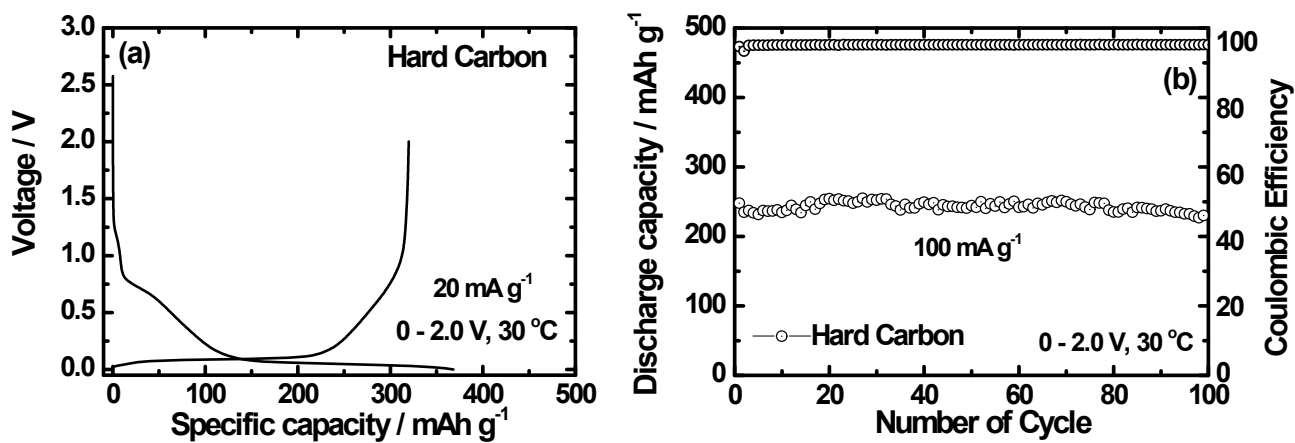

**Fig. S8** Electrochemical performance of hard carbon electrode: (a) 1<sup>st</sup> discharge-charge curves at 20 mA g<sup>-1</sup> and (b) cycle life test at 100 mA g<sup>-1</sup> in the voltage range of 0–2.0 V.

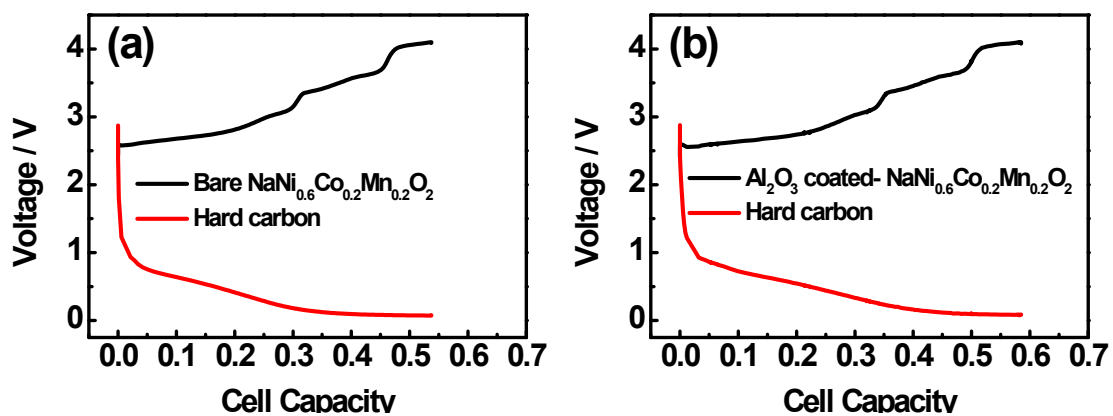

**Fig. S9** Galvanostatic voltage profiles of (a) bare  $\text{Na}[\text{Ni}_{0.6}\text{Co}_{0.2}\text{Mn}_{0.2}]\text{O}_2/\text{hard carbon}$  and (b)  $\text{Al}_2\text{O}_3$  coated  $\text{Na}[\text{Ni}_{0.6}\text{Co}_{0.2}\text{Mn}_{0.2}]\text{O}_2/\text{hard carbon}$  cells upon charge process.

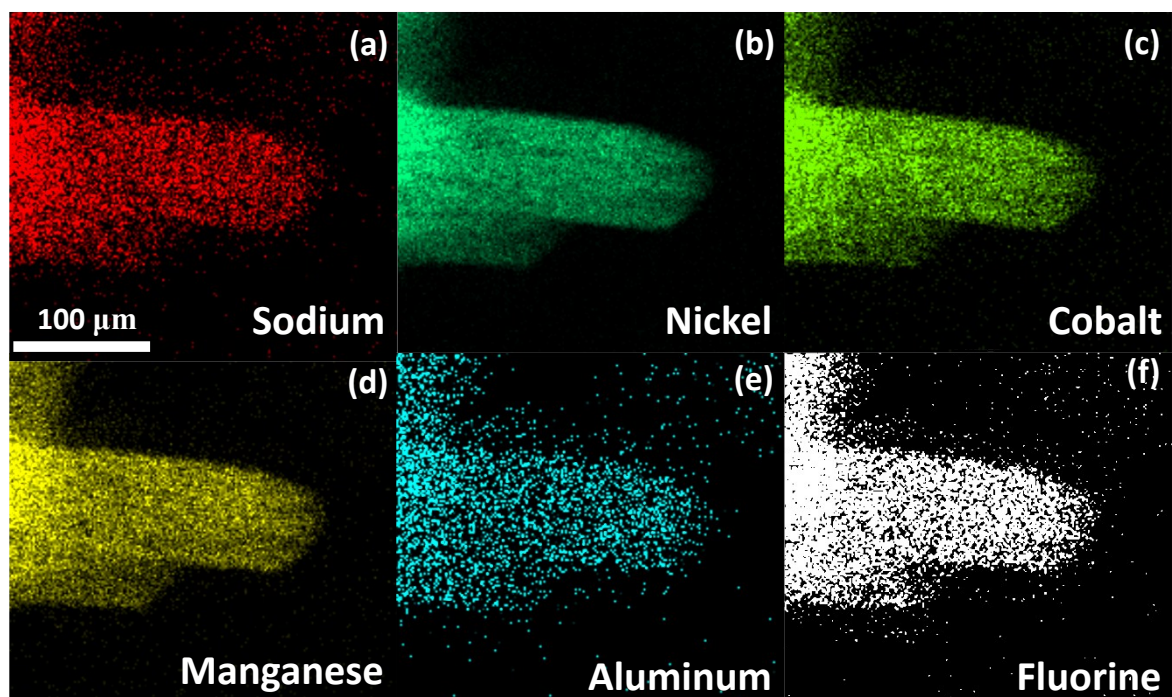

**Fig. S10** TEM EDX mapping data of cycled  $\text{Al}_2\text{O}_3$  electrode collected from pouch-type full cell: (a) sodium, (b) nickel, (c) cobalt, (d) manganese, (e) aluminum and (f) fluorine.

**Table S3.** HF amounts in bare Na[Ni<sub>0.6</sub>Co<sub>0.2</sub>Mn<sub>0.2</sub>]O<sub>2</sub> and Al<sub>2</sub>O<sub>3</sub> coated Na[Ni<sub>0.6</sub>Co<sub>0.2</sub>Mn<sub>0.2</sub>]O<sub>2</sub> cathodes collected from pouch-type full cells after 300 cycles.

| Sample                                                                                                                 | HF Amount (ppm) |
|------------------------------------------------------------------------------------------------------------------------|-----------------|
| Blank                                                                                                                  | 50.02526        |
| Bare Na[Ni <sub>0.6</sub> Co <sub>0.2</sub> Mn <sub>0.2</sub> ]O <sub>2</sub> cathode                                  | 349.6795        |
| Al <sub>2</sub> O <sub>3</sub> coated Na[Ni <sub>0.6</sub> Co <sub>0.2</sub> Mn <sub>0.2</sub> ]O <sub>2</sub> cathode | 83.33222        |

**Table S4.** Estimated energy density calculation and individual mass fraction based on pouch cell parameters of traditional LIB cells.

| Energy Density Calculation (Wh/kg) |             |                                                        |  |  |       |          |        |          |
|------------------------------------|-------------|--------------------------------------------------------|--|--|-------|----------|--------|----------|
|                                    |             | Energy Density Calculation (Wh/kg)                     |  |  | Value | Quantity | weight |          |
| N/P ratio                          | 1.15        |                                                        |  |  |       |          |        |          |
| Cathode                            | Cathode     | Capacity (mAh/g)                                       |  |  |       | 151      |        |          |
|                                    |             | Working potential (vs Na <sup>+</sup> )                |  |  |       | 3        |        |          |
|                                    |             | Composition of Active material                         |  |  |       | 0.95     |        |          |
|                                    |             | Mass Loading of active materials (mg/cm <sup>2</sup> ) |  |  |       | 25       | 7.5    | 7.894737 |
|                                    |             | Length (mm)                                            |  |  |       | 50       |        |          |
|                                    |             | Width (mm)                                             |  |  |       | 30       |        |          |
|                                    |             | Area capacity (mAh/cm <sup>2</sup> )                   |  |  |       | 3.75     |        |          |
|                                    | Al foil     | Thickness (mm)                                         |  |  |       | 0.012    | 10     | 0.48     |
|                                    | Cathode tab |                                                        |  |  |       |          | 1      | 0.04     |
|                                    | Anode       | Capacity (mAh/g)                                       |  |  |       | 300      |        |          |
|                                    |             | Working potential (vs Na <sup>+</sup> )                |  |  |       | 0        |        |          |
|                                    |             | Composition of Active material                         |  |  |       | 0.95     |        |          |
|                                    |             | Mass Loading of active materials (mg/cm <sup>2</sup> ) |  |  |       | 14.375   | 4.543  | 4.784    |



|  |              |                                      |  |  |                 |        |        |       |
|--|--------------|--------------------------------------|--|--|-----------------|--------|--------|-------|
|  |              | Length (mm)                          |  |  |                 | 51     |        |       |
|  |              | Width (mm)                           |  |  |                 | 31     |        |       |
|  |              | Area capacity (mAh/cm <sup>2</sup> ) |  |  |                 | 4.3125 |        |       |
|  | Cu foil      | Thickness (mm)                       |  |  |                 | 0.008  | 11     | 1.265 |
|  | Anode tab    |                                      |  |  |                 |        | 1      | 0.13  |
|  | Packing foil | Thickness (mm)                       |  |  |                 | 0.086  | 1      | 0.6   |
|  | Electrolyte  |                                      |  |  |                 |        |        | 4     |
|  | Separator    | Thickness (mm)                       |  |  |                 | 0.011  |        | 0.33  |
|  | Sealant      |                                      |  |  |                 |        | 1      | 0.01  |
|  |              |                                      |  |  | Cell weight (g) |        | 19.534 |       |

| Cell Size<br>(mm x mn) |      | Layers | Cell weight<br>(g) | Cell capacity<br>(mAh) | Voltage<br>(V) | Energy density<br>(Wh/kg) |
|------------------------|------|--------|--------------------|------------------------|----------------|---------------------------|
| 35                     | 57.5 | 20     | 19.53              | 843.75                 | 3              | 130.23                    |
